## RESEARCH ARTICLE

# A distal 594 bp ECR specifies *Hmx1* expression in pinna and lateral facial morphogenesis and is regulated by the Hox-Pbx-Meis complex

Jessica M. Rosin<sup>1</sup>, Wenjie Li<sup>1,2</sup>, Liza L. Cox<sup>1,3</sup>, Sara M. Rolfe<sup>1</sup>, Victor Latorre<sup>4</sup>, Jennifer A. Akiyama<sup>5</sup>, Axel Visel<sup>5,6,7</sup>, Takashi Kuramoto<sup>8</sup>, Nicoletta Bobola<sup>4</sup>, Eric E. Turner<sup>9,10</sup> and Timothy C. Cox<sup>1,2,3,11,\*</sup>

## ABSTRACT

*Hmx1* encodes a homeodomain transcription factor expressed in the developing lateral craniofacial mesenchyme, retina and sensory ganglia. Mutation or mis-regulation of *Hmx1* underlies malformations of the eye and external ear in multiple species. Deletion or insertional duplication of an evolutionarily conserved region (ECR) downstream of *Hmx1* has recently been described in rat and cow, respectively. Here, we demonstrate that the impact of *Hmx1* loss is greater than previously appreciated, with a variety of lateral cranioskeletal defects, auriculofacial nerve deficits, and duplication of the caudal region of the external ear. Using a transgenic approach, we demonstrate that a 594 bp sequence encompassing the ECR recapitulates specific aspects of the endogenous *Hmx1* lateral facial expression pattern. Moreover, we show that *Hoxa2*, *Meis* and *Pbx* proteins act cooperatively on the ECR, via a core 32 bp sequence, to regulate *Hmx1* expression. These studies highlight the conserved role for *Hmx1* in BA2-derived tissues and provide an entry point for improved understanding of the causes of the frequent lateral facial birth defects in humans.

**KEY WORDS:** *Hmx1*, Evolutionarily conserved region (ECR), Enhancer, Craniofacial mesenchyme, Pinna, Mouse

## INTRODUCTION

Mutation of the homeodomain transcription factor *Hmx1* results in malformation of the external ear and eye. This condition has been termed oculo-auricular syndrome (OAS) in humans (Schorderet et al., 2008; Gillespie et al., 2015), ‘dumbo’ and/or ‘misplaced ears’ in mice, ‘dumbo’ in rats (Munroe et al., 2009; Kuramoto et al., 2010; Quina et al., 2012a), and ‘crop ear’ in cattle (Koch et al., 2013).

<sup>1</sup>Center for Developmental Biology & Regenerative Medicine, Seattle Children’s Research Institute, Seattle, WA 98101, USA. <sup>2</sup>Department of Oral Health Sciences, University of Washington, Seattle, WA 98195, USA. <sup>3</sup>Department of Pediatrics (Craniofacial Medicine), University of Washington, Seattle, WA 98195, USA. <sup>4</sup>School of Dentistry, Faculty of Medical and Human Sciences, University of Manchester, Manchester M13 9PT, UK. <sup>5</sup>Functional Genomics Department, Lawrence Berkeley National Laboratory, Berkeley, CA 94720, USA. <sup>6</sup>DOE Joint Genome Institute, Walnut Creek, CA 94598, USA. <sup>7</sup>School of Natural Sciences, University of California, Merced, CA 95343, USA. <sup>8</sup>Institute of Laboratory Animals, Graduate School of Medicine, Kyoto University, Kyoto 606-8501, Japan. <sup>9</sup>Center for Integrative Brain Research, Seattle Children’s Research Institute, Seattle, WA 98101, USA. <sup>10</sup>Department of Psychiatry and Behavioral Sciences, University of Washington, Seattle, WA 98195, USA. <sup>11</sup>Department of Anatomy and Developmental Biology, Monash University, Clayton, VIC 3800, Australia.

\*Author for correspondence (tccox@uw.edu)

© L.L.C., 0000-0002-0703-7258; J.A.A., 0000-0002-0667-9355; A.V., 0000-0002-4130-7784; N.B., 0000-0002-7103-4932; E.E.T., 0000-0001-5499-6788; T.C.C., 0000-0001-8015-5528

Received 2 December 2015; Accepted 23 May 2016

Previous work has also shown that *Hmx1* is essential for the development of sensory neurons in the geniculate/facial ganglion (Quina et al., 2012b).

OAS in humans and the *dumbo* phenotype in mice are both recessive phenotypes that result from loss-of-function mutations in the *Hmx1* coding region (Schorderet et al., 2008; Munroe et al., 2009; Vaclavik et al., 2011; Gillespie et al., 2015). However, in rats, the recessive *dumbo* allele consists of a 5777 bp deletion ~80 kb downstream of *Hmx1*. This deletion is associated with a loss of *Hmx1* expression only in the first and second branchial arch (BA1 and BA2) mesenchyme (Quina et al., 2012a), suggesting that the deletion removes an important regulatory element driving *Hmx1* expression in the lateral face. This deleted sequence contains a ~600 bp evolutionarily conserved region (ECR). Remarkably, the recessive *crop ear* allele in cattle also involves this ECR, specifically a 76 bp duplication of the central core (Koch et al., 2013).

The *dumbo* and OAS phenotypes suggest that the role of *Hmx1* is distinct from that of classic homeobox transcription factors, such as *Hoxa2*, which act early in the patterning of the branchial arch region. Patients with mutations in *HOXA2* display severe microtia, middle ear deformities and hearing loss (Alasti et al., 2008). By contrast, OAS patients and *dumbo* mice have dysmorphic external ears but the middle ear and hearing appear to be unaffected (Schorderet et al., 2008; Munroe et al., 2009; Gillespie et al., 2015).

In the present study, we show that the 594 bp distal ECR functions as a strong and highly dynamic lateral facial enhancer that recapitulates specific aspects of the endogenous *Hmx1* expression pattern. Moreover, we provide evidence that the upstream patterning factors *Hoxa2*, *Meis* and *Pbx* act cooperatively on sequences within the ECR to regulate *Hmx1*. We also describe an array of previously unappreciated lateral cranioskeletal anomalies in *dumbo* mice and in outbred *dumbo* rats. Taken together, our findings support the hypothesis that *Hmx1* plays an important evolutionarily conserved role in lateral facial mesenchyme differentiation, downstream of embryonic patterning genes, providing an entry point into understanding the regulatory network underpinning common lateral facial birth defects.

## RESULTS

## *Hmx1* mutant mice exhibit craniofacial and cranioskeletal anomalies

To undertake a thorough assessment of the *dumbo* phenotype, we first transferred the mutation on to a pure C57Bl/6N background by more than ten backcrosses. Mendelian transmission of the *dumbo* allele was observed between embryonic day (E) 10.5 and E14.5 (42 *Hmx1*<sup>+/+</sup>, 105 *Hmx1*<sup>+/*dm*</sup> and 37 *Hmx1*<sup>*dm/dm*</sup> embryos;  $\chi^2$

$P=0.1391$ ). However, similar to the previous study on a mixed genetic background (Munroe et al., 2009), we observed non-Mendelian transmission of the *dumbo* allele in post-weaning animals; specifically, 49 *Hmx1*<sup>+/+</sup>, 86 *Hmx1*<sup>+/*dm*</sup> and 21 *Hmx1*<sup>*dm/dm*</sup> mice (31.4%, 55.1% and 13.5%, respectively;  $\chi^2$   $P=0.0029$ ), suggesting ~57% perinatal lethality of homozygous mutants, which appeared to be equally distributed between the sexes. In contrast to the earlier report (Munroe et al., 2009), only post-weaning *Hmx1*<sup>*dm/dm*</sup> male mice showed a significant reduction in weight, on average ~23% lighter than controls (control: 17.28±0.494 g, *Hmx1*<sup>*dm/dm*</sup>: 13.29±1.102 g). Female *Hmx1*<sup>*dm/dm*</sup> mice were comparable in weight to controls (control: 13.59±0.762 g, *Hmx1*<sup>*dm/dm*</sup>: 13.11±0.440 g).

Imaging of embryos using optical projection tomography (OPT) demonstrated that auricular anomalies were evident in *Hmx1*<sup>*dm/dm*</sup> animals as early as E11.5 (data not shown). By E13.5, all mutants could be recognized by a distinct bifurcation of the developing lobe and a failure or delay in rotation of the developing auricle, giving it a ventrally displaced appearance (Fig. 1A,B), which became more pronounced during later embryonic stages (Fig. 1C,D). Postnatally, this bifurcation in *dumbo* mice developed into an ectopic cartilaginous flap (caudal duplication) of the pinna (Fig. 1E-H).

Two of nine E14.5 *Hmx1*<sup>*dm/dm*</sup> imaged embryos, both males, presented with an anterior head malformation overlying the anlage of the pre-tectum, caudal to the epiphysis and pineal recess, at the

junction between the diencephalon and the mesencephalon (Fig. S1A-D'). This may represent a mild neural tube defect related to the exencephaly previously documented on the mixed background (Munroe et al., 2009) and might contribute to the occasional perinatal lethality of homozygous mutant embryos.

Postnatal day (P) 28 *Hmx1*<sup>*dm/dm*</sup> and control mice were then examined using high-resolution microCT imaging. Although *Hmx1*<sup>*dm/dm*</sup> mice had smaller skulls (Fig. S1E,F'), these were deemed to be proportional to body size after correcting for differences in body mass or long bone length (data not shown). Despite this, *Hmx1*<sup>*dm/dm*</sup> mice did exhibit a number of specific cranial malformations. In two male *Hmx1*<sup>*dm/dm*</sup> mutants, but no female mutants or controls of either sex, a frontal bone/posterior frontal suture anomaly was noted (Fig. S1E-F), which could be related to the anterior head malformation shown in Fig. S1A-D'. However, in all mutants (both sexes) but no controls, premature fusion of the squamosal and parietomastoid sutures was observed (Fig. S1E'-F'). In addition, all *Hmx1*<sup>*dm/dm*</sup> mice exhibited hypoplasia of the temporal processes of the occipital bone (Fig. S1E'-F') as well as marked hypoplasia of each paraoccipital process (Fig. 1K-N). Notably, microCT imaging of a small number of outbred adult *dumbo* rats and their littermate controls revealed that the *dumbo* rats also exhibited marked hypoplasia of the paraoccipital processes, mirroring that seen in the *Hmx1*<sup>*dm/dm*</sup> mice (Fig. 1O-R). Using a deformable registration-based tool to assess

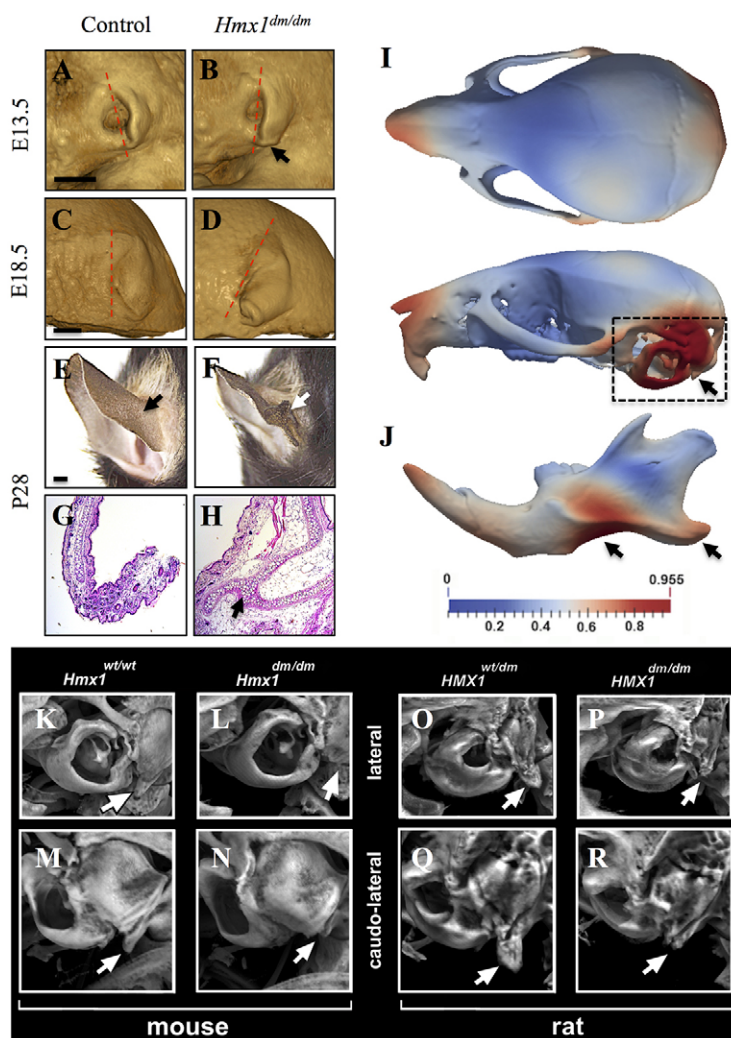

**Fig. 1. Characterization of craniofacial defects and shape changes in *Hmx1*<sup>*dm/dm*</sup> mutant animals.**

(A-D) OPT imaging of E13.5 (A,B; control  $n=4$ , *Hmx1*<sup>*dm/dm*</sup> mutant  $n=5$ ) and E18.5 (C,D; control  $n=2$ , *Hmx1*<sup>*dm/dm*</sup> mutant  $n=2$ ) control (A,C) and *Hmx1*<sup>*dm/dm*</sup> mutant (B,D) embryos show morphological differences in the external ear (arrow). The most commonly observed pinna morphologies are displayed. Dashed line indicates pinna orientation. (E-H) Representative posterior view (E,F) and Hematoxylin & Eosin-stained sections (G,H) through a P28 control (E,G) and *Hmx1*<sup>*dm/dm*</sup> mutant (F,H) ear highlight the malformation present in *Hmx1*<sup>*dm/dm*</sup> mutant mice (E,F,H, arrows; control  $n=28$ , *Hmx1*<sup>*dm/dm*</sup> mutant  $n=17$ ). (I,J) Deformational analysis of P28 *Hmx1*<sup>*dm/dm*</sup> skulls and mandibles. Heat maps are projected onto a standard control skull and highlight the relative mean shape differences (control  $n=24$ , *Hmx1*<sup>*dm/dm*</sup>  $n=17$ ). Dashed box and arrows highlight the highest magnitude of shape differences present in the skull (I) and mandible (J) of *Hmx1*<sup>*dm/dm*</sup> animals. (K-R) MicroCT analysis of control (K,M) and *Hmx1*<sup>*dm/dm*</sup> mutant (L,N) mouse skulls and heterozygote (O,Q) and homozygote (P,R) *dumbo* rat skulls. Marked hypoplasia of the paraoccipital process is evident in *Hmx1*<sup>*dm/dm*</sup> mutant mice and rats (compare K with L, and O with P, arrows for lateral view; compare M with N, and Q with R, arrows for caudo-lateral view). Control *Hmx1*<sup>*+/+*</sup> mice ( $n=28$ ) and *Hmx1*<sup>*dm/dm*</sup> mutant mice ( $n=17$ ). *Hmx1*<sup>*dm/+/*</sup> rats ( $n=2$ ) and *Hmx1*<sup>*dm/dm*</sup> mutant ( $n=2$ ). Scale bars: 1 mm (A-F).



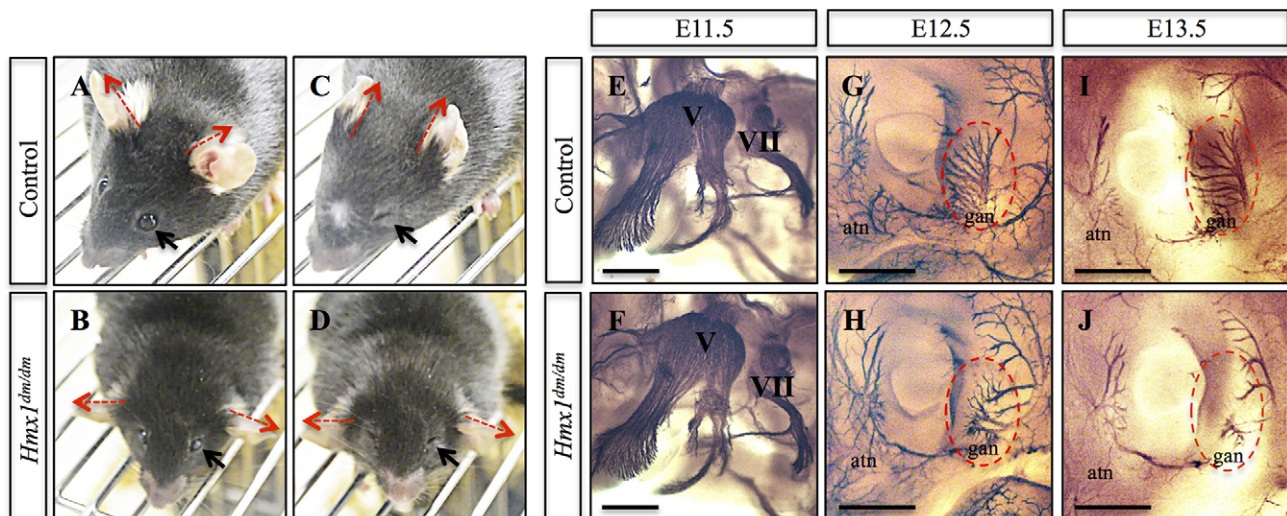

**Fig. 2. *Hmx1*<sup>dm/dm</sup> animals show abnormal response to an aversive facial stimulus and defects in sensory nerve branches.** (A-D) Representative images of control (A,C) and *Hmx1*<sup>dm/dm</sup> (B,D) mice before (A,B) and during the air puff test (C,D) demonstrate that *Hmx1*<sup>dm/dm</sup> mice, in contrast to controls, do not move their ears in response to having air blown on their face (compare red dashed arrows in A with C, and B with D; control *n*=8, *Hmx1*<sup>dm/dm</sup> *n*=7), although *Hmx1*<sup>dm/dm</sup> mice can effectively close their eyes (compare black arrow in A with C, and B with D). (E,F) Neurofilament staining of E11.5 embryos using a 2H3 antibody demonstrate that the trigeminal (V) ganglion is intact in *Hmx1*<sup>dm/dm</sup> embryos (control *n*=6, *Hmx1*<sup>dm/dm</sup> *n*=5). (G-J) Noticeable defects can be seen by 2H3 staining in the great auricular nerve (gan) and the auriculotemporal nerve (atn) that surround and innervate the pinna of *Hmx1*<sup>dm/dm</sup> embryos at both E12.5 (compare G with H, red dashed oval; control *n*=6, *Hmx1*<sup>dm/dm</sup> *n*=4) and E13.5 (compare I with J, red dashed oval; control *n*=8, *Hmx1*<sup>dm/dm</sup> *n*=2). Scale bars: 500  $\mu$ m (E-J).

skull shape objectively (Rolfe et al., 2013), we also found that the difference in skull shape between *Hmx1*<sup>dm/dm</sup> mice and background-matched controls extended beyond these structures. For example, this quantitative analysis showed significant differences over the snout, more broadly over the otic region and back of the skull (Fig. 1I), as well as over the mandibular body and angular process (Fig. 1J). The mandibular and otic region phenotypes showed relatively little variability (as determined by an assessment of the standard deviation of each shape dataset), consistent with these lateral facial features being robust and penetrant.

#### ***Hmx1*<sup>dm/dm</sup> mutants exhibit abnormal nerve branching and organization surrounding the pinna**

Given the nature of the lateral cranioskeletal dysmorphology, and the prior finding of a geniculate ganglion (sensory nerve) defect in *dumbo* mice (Quina et al., 2012b), we considered the possibility that these arise as a result of nerve and/or muscle defects. To begin to investigate this, we performed a facial stimulus test involving exposure to a 10 s puff of air (Arenkiel et al., 2004; Tvrdik and Capecci, 2006). Although mutant and control mice both responded to the puff by closing their eyes, only the control mice tucked their ears back against their heads: the ears of *Hmx1*<sup>dm/dm</sup> mice remained perpendicular to the head (compare Fig. 2A,C with 2B,D).

In order to determine whether *Hmx1* directly contributes to either muscle or nerve development and organization, we performed immunohistochemistry for *Isl1*, a known marker for muscle precursors in BA2 (Nathan et al., 2008; Gopalakrishnan et al., 2015), and for neurofilament. Using dmECR-driven *lacZ* activity as a proxy for endogenous *Hmx1* (see below), we found that *Hmx1* was not present in muscle precursor cells (Fig. S2B). With the neurofilament staining, we consistently observed abnormalities in the branching and organization of the nerves in and surrounding the pinna in *Hmx1*<sup>dm/dm</sup> embryos at both E12.5 and E13.5 (Fig. 2G-J). Most prominently, the leaf-like branching of the great auricular nerve that penetrates the caudal aspects of the pinna was markedly reduced in *Hmx1*<sup>dm/dm</sup> embryos compared with controls (compare

Fig. 2G,I with Fig. 2H,J). Differences in the auriculotemporal nerve, a somatosensory branch of the mandibular nerve, were also apparent (Fig. 2G-J). By contrast, the trigeminal (V) nerve was of normal appearance in mutants (Fig. 2E,F).

#### **A 594 bp sequence containing an ECR and present within the region deleted in *dumbo* rats is sufficient to drive expression in lateral craniofacial tissue**

Previously, we showed that the deleted interval in the *dumbo* rat was associated with specific loss of *Hmx1* expression in BA1 and BA2 mesenchyme (Quina et al., 2012a,b). This data supported the notion that the region harbors a putative regulatory element required for the convergence of the mouse and rat *dumbo* ear phenotypes. To test whether this region functions as a *cis*-regulatory element (enhancer) sufficient to drive *Hmx1* expression in the developing ear, we independently tested both a 6094 bp sequence from C57Bl/6 mouse genomic DNA that was homologous to the region deleted in the *dumbo* rat, as well as a smaller 594 bp fragment that just contained the ECR (dmECR) for enhancer activity using a *lacZ* reporter in transient transgenesis (Fig. 3C-O). All five transgenic embryos produced from the larger construct showed  $\beta$ -galactosidase staining in BA2 at E11.5 (Fig. 3C-G). Three of these embryos also exhibited staining in a strip of mesenchyme across the frontonasal region, in the dorsal BA1 mesenchyme and dorsal side of the eye (Fig. 3D-F). All eight of the transient transgenic embryos generated from the small dmECR fragment showed remarkably consistent staining (Fig. 3H-O) in the same regions observed in the embryos created using the larger construct: specifically, strong staining in BA2, the dorsal aspect of BA1, the mesenchyme dorsal to the eye, and in a strip of tissue across the frontonasal region. Thus, the 594 bp sequence encompassing the ECR is sufficient to direct expression to these key regions relevant to the observed craniofacial deformities in *Hmx1*<sup>dm/dm</sup> mice and rats.

We then generated stable transgenic lines for the dmECR-*lacZ* reporter. Staining of E11.5 embryos from four independent

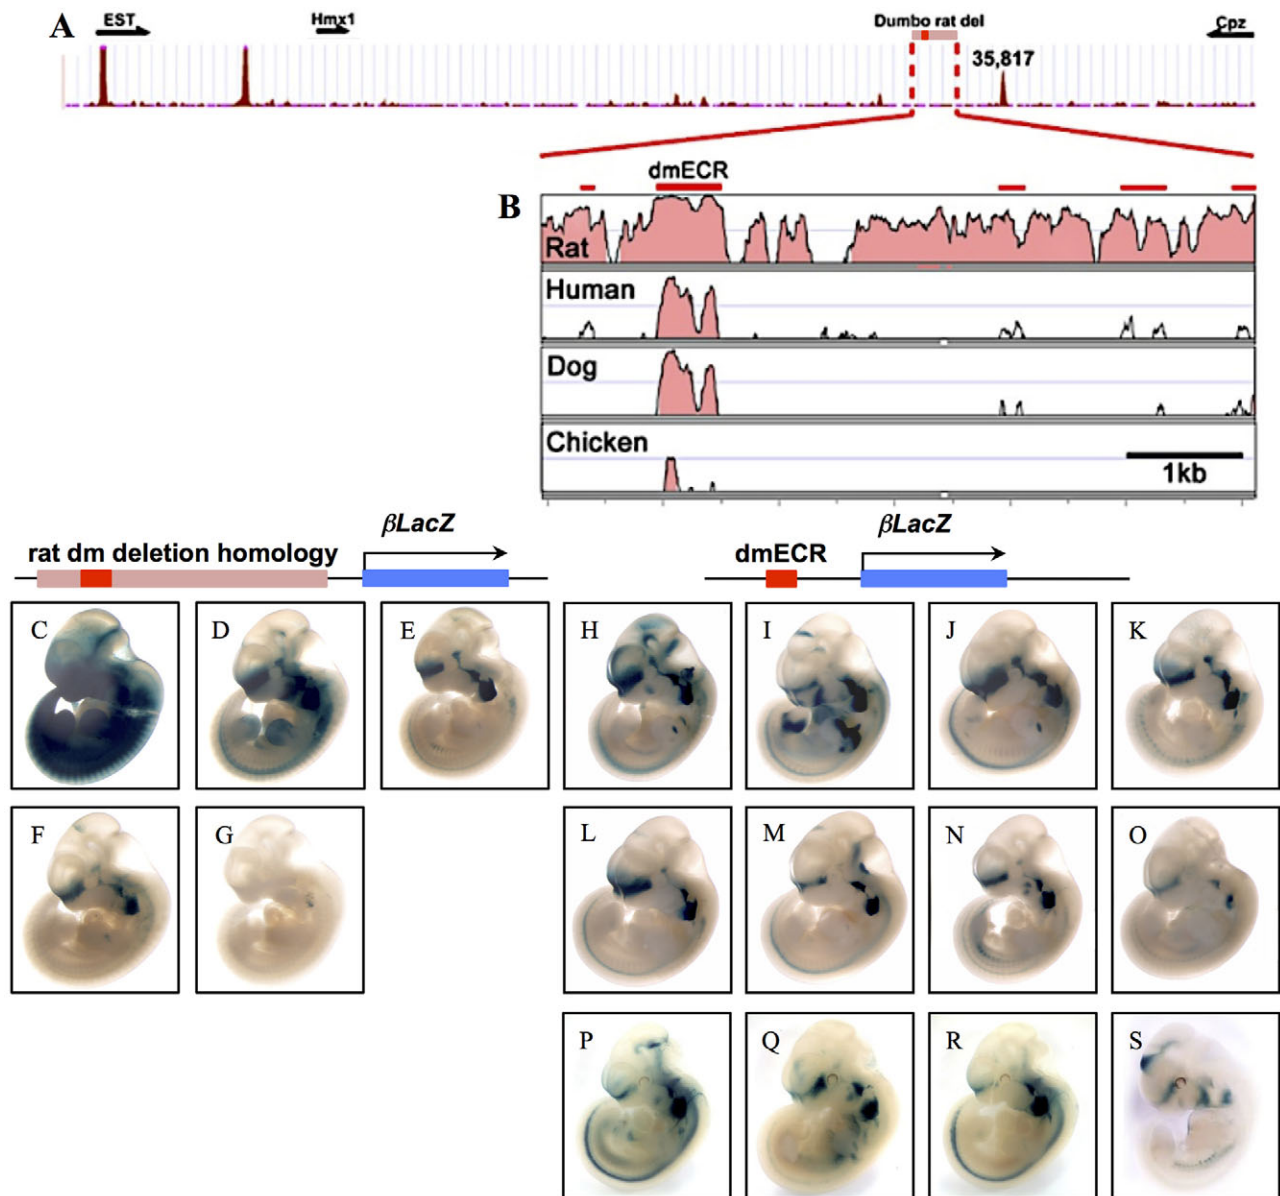

**Fig. 3. Transient transgenic analysis identifies a functional ECR conferring facial-specific expression.** (A) CTCF binding at 35,817 kb identifies an 'insulator' sequence separating *Hmx1* regulatory sequences from regulatory elements in *Cpz*. (B) VISTA plot of the rat *dumbo* deletion region (5777 bp) showing the dmECR (thick red bar) and additional regions less strongly conserved across mammalian species (red bars). (C-G) E11.5 transient transgenic embryos generated from a 6094 bp construct, encompassing the 5777 bp rat deletion region, show staining in BA2 at E11.5. (H-S) E11.5 transient transgenic (H-O) and stable transgenic (P-S) lines generated from a 594 bp sequence, encompassing the ECR, show strong staining in the frontonasal region, in addition to the craniofacial mesenchyme of dorsal BA1, and completely throughout BA2.

founders revealed a common pattern consistent with the results of the transient transgenesis experiments (Fig. 3P-S). In addition, each transgenic line exhibited a few additional regions of staining, possibly due to insertion site effects. These included the limbs, brain, heart, dorsal root ganglia and derivatives of the lateral plate mesoderm (Fig. 3P-S).

The activity of the dmECR-*lacZ* transgene was then analyzed at developmental stages ranging from E9.5 to E16.5 using the line displayed in Fig. 3P, although similar results were observed for the line shown in Fig. 3R (data not shown). This assessment showed minimal activity at E9.5 (data not shown). By E10.5, activation of the dmECR was readily observed in the frontonasal region and throughout BA2 (Fig. 4A,A'). At E11.5, expression expanded to include the dorsal region of BA1 (Fig. 4B,B'). From

E12.5 to E13.5, the dmECR drove transgene expression in the frontonasal region and lateral facial mesenchyme, including tissue surrounding the eye and in a band of tissue at the back of the head that included the posterior region of the developing pinna (Fig. 4C-D'). The dmECR-*lacZ* transgene continued to be expressed in two broader domains within the head and face that became more regionally restricted and separate from one another between E14.5 and E16.5 (Fig. 4E,F,G); specifically, the rostral face, including the frontonasal region and tissue surrounding the eye, and a separate expression domain in the caudal region of the head, extending from the posteriorly restricted staining in the pinna to the back of the head (Fig. 4E-G'). This particular transgenic line also showed expression in the midbrain, hindbrain, zeugopod, both the fore- and hindlimb digits, ribs and the



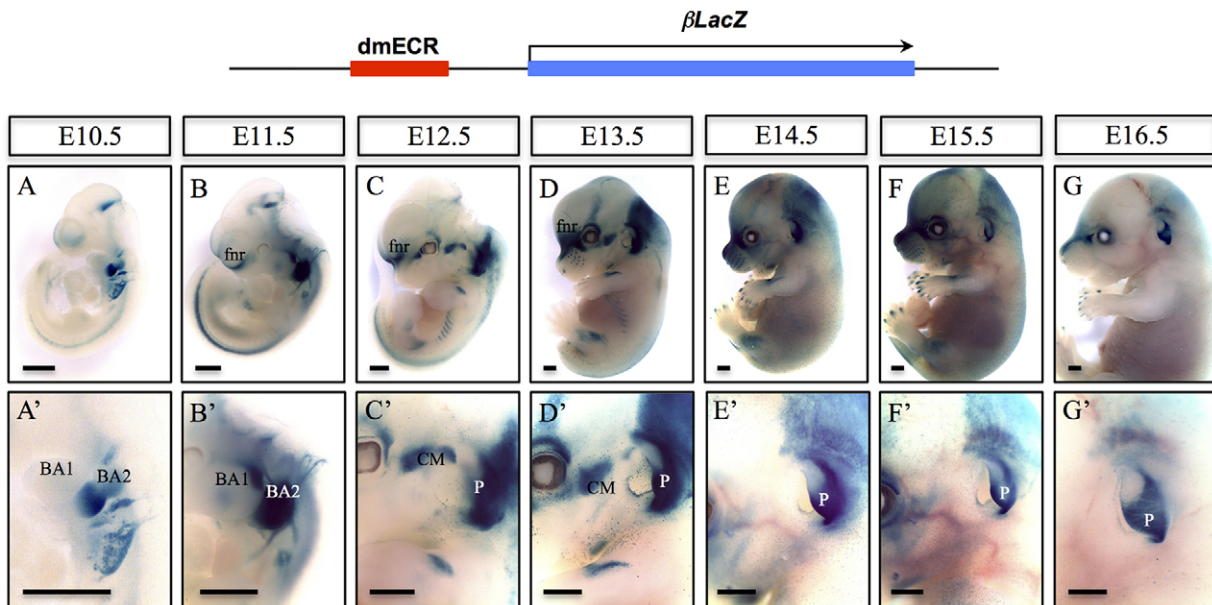

**Fig. 4. dmECR-driven reporter gene activity shows dynamic expression from E10.5 to E16.5.** (A-G') Developmental series of E10.5 (A,A'), E11.5 (B,B'), E12.5 (C,C'), E13.5 (D,D'), E14.5 (E,E'), E15.5 (F,F') and E16.5 (G,G') embryo staining from the 594 bp dmECR transgenic line shown in Fig. 3P. CM, craniofacial mesenchyme; fnr, frontal nasal region; P, pinna. Scale bars: 1 mm.

developing neural tube, which were not observed in all of the lines characterized, and may or may not be related to dmECR function.

To validate that the dmECR activity reflected endogenous *Hmx1* expression, we sectioned E10.5, E11.5 and E14.5 dmECR-*lacZ* transgenic embryos and performed *Hmx1* immunohistochemistry following X-gal staining. Analysis of the two-color staining patterns revealed that the dmECR and *Hmx1* expression domains strongly overlapped in both the anterior (Fig. 5G,G') and posterior (Fig. 5H) regions of BA2 at E10.5. At E11.5,  $\beta$ -galactosidase staining overlapped endogenous *Hmx1* expression in the rostral zone of the lateral craniofacial mesenchyme (Fig. 5J), but was absent from the caudal zone of endogenous *Hmx1* expression. At the level of the trigeminal ganglion, dmECR activity overlapped *Hmx1* staining in the dorsal region of BA1 (Fig. 5K). As previously reported, endogenous *Hmx1* is readily detectable in the trigeminal, geniculate and statoacoustic ganglia (Quina et al., 2012b), but the dmECR is not active in these regions (Fig. 5C,E,K), consistent with the retention of *Hmx1* expression in the cranial sensory ganglia in the *dumbo* rat (Quina et al., 2012a). At the level of the embryonic eye, dmECR activity is present in the anterior mesoderm, whereas endogenous *Hmx1* is expressed in the eye itself (Fig. 5B,D,L-M), consistent with the *dumbo* rat findings (Quina et al., 2012a). However, in the anterior craniofacial mesenchyme of BA2 at E11.5, dmECR activity and endogenous *Hmx1* expression overlapped only in a band of cells at the interface between the expression domains (Fig. 5N). Moving posteriorly within the transverse plane, we found an increase in the cell populations that displayed both dmECR activity and *Hmx1*, although this was regionally restricted to the dorsal domain of BA2 (Fig. 5O). The restricted overlap between dmECR activity and *Hmx1* in BA2 at E11.5 could represent an example of perdurance; that is, persistence of  $\beta$ -galactosidase activity from an earlier time point (i.e. precursor cell population) when endogenous *Hmx1* was expressed but has since turned off.

Similar to that observed at E10.5 and E11.5, the dmECR pattern of activity at E14.5 overlapped with that of endogenous *Hmx1*, particularly in the pinna (Fig. 5Q-V) and frontonasal region (Fig. 5W). We also detected discordant expression of dmECR and

*Hmx1* in the trigeminal ganglion (Fig. 5R), eye (Fig. 5V') and craniofacial mesenchyme of the lateral face (Fig. 5X), which could be a result of ectopic dmECR activity. Despite these regions of discordance, the distribution of the dmECR-driven reporter overlapped with endogenous *Hmx1* in the craniofacial mesenchyme that contributes to structures that are abnormal in the *dumbo* rat (Fig. 1O-R) (Quina et al., 2012a).

#### Expansion of dmECR activity and endogenous *Hmx1* expression in *dumbo* mutants

When we introduced the dmECR-*lacZ* reporter onto the *dumbo* (*Hmx1<sup>dm/dm</sup>*) background, we noticed a consistent expansion of the dmECR-driven  $\beta$ -galactosidase staining in the mesenchyme between the eye and ear of E11.5 to E14.5 *Hmx1<sup>dm/dm</sup>* embryos that was not seen in controls (Fig. 6A-D; data not shown). Quantification of this dmECR-stained region in E12.5 embryos (Fig. 6E,F) revealed an expansion of dmECR-*lacZ*<sup>+</sup> tissue in mutant embryos to almost double that seen in controls (Fig. 6G). *In situ* hybridization in E11.5 and E12.5 *Hmx1<sup>dm/dm</sup>* embryos and controls (Fig. 6I-L) revealed that endogenous *Hmx1* mRNA expression was also expanded (compare Fig. 6I,K with 6J,L), confirming that this was not just a phenomenon associated with the dmECR and suggested that *Hmx1* negatively regulates its own expression via the dmECR. Proliferation (Ki67) and cell death (cleaved caspase 3) remained comparable between control and *Hmx1<sup>dm/dm</sup>* embryos in this region (Fig. S3A-I).

#### Hox, Pbx and Meis function cooperatively to activate the dmECR

Examination of the dmECR sequence revealed consensus binding site sequences for the combined Hox-Pbx complex (Amin et al., 2015) within the most highly conserved part of the dmECR (Fig. 7). *Hoxa2* and *Pbx1*, as well as their partner Meis proteins (Gendron-Maguire et al., 1993; Rijli et al., 1993; Selleri et al., 2001) are known to be expressed in the early lateral facial mesenchyme and contribute to BA2 morphogenesis. To investigate whether the dmECR is occupied by the Hox-Pbx-Meis complex *in vivo*, we

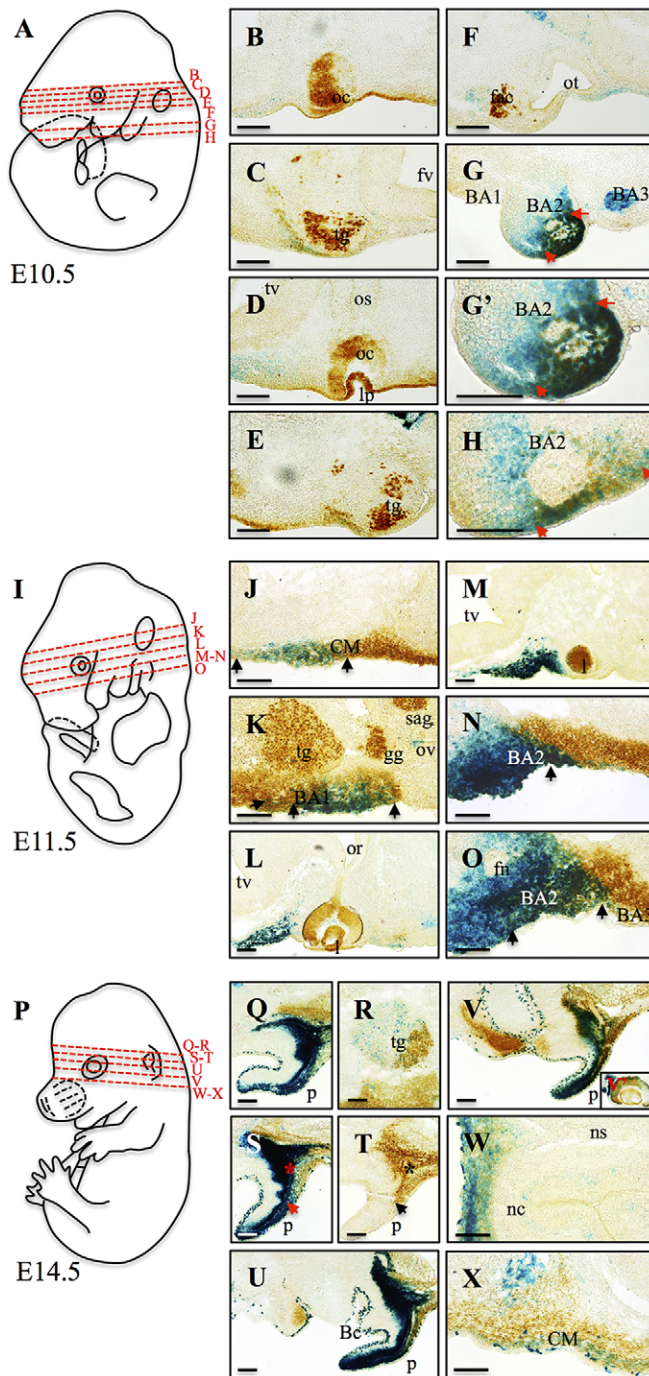

**Fig. 5. dmEKR enhancer activity overlaps endogenous Hmx1 protein localization.** (A,I,P) Diagrams of E10.5 (A), E11.5 (I) and E14.5 (P) mouse embryos highlighting the different transverse sections displayed in B-H (E10.5), J-O (E11.5) and Q-X (E14.5). (B-H,J-O,Q-X) Comparison of endogenous mouse Hmx1 expression (brown) with dmEKR enhancer activity, visualized by staining with X-gal (blue), in transverse cryosections at E10.5, E11.5 and E14.5. (G-H) dmEKR and Hmx1 expression domains overlap in the anterior (G,G') and posterior (H) regions of the exterior portion of BA2 at E10.5 (red arrows). (J) At E11.5, sectioning showed overlap between dmEKR staining in the craniofacial mesenchyme (CM) of the lateral face with the rostral CM expression of endogenous Hmx1 (black arrows). (K) E11.5 dmEKR staining overlaps endogenous Hmx1 in dorsal BA1 (black arrows). (N) Few cells share dmEKR and Hmx1 expression domains in the CM of the anterior region of BA2 (black arrow) at E11.5. (O) Posteriorly, dmEKR and Hmx1 expression domains were regionally restricted to the dorsal domain of BA2 at E11.5 (black arrows). (Q,S-V) Adjacent to the ear, overlapping dmEKR and Hmx1 staining is evident (asterisks). In the ear, the ventral dmEKR activity was almost distinct from the small dorsal region of endogenous Hmx1 expression (arrows). (R) Overlap in dmEKR activity and endogenous Hmx1 was evident in the caudal region of the trigeminal ganglion (tg). (V'-X) Overlap in dmEKR and Hmx1 expression was also apparent in the eye (V'), the frontonasal region (W) and CM of the lateral face (X). BA1-3, branchial arches 1-3; Bc, branchial cleft; fac, facial acoustic complex; fn, facial nerve; fv, fourth ventricle; gg, geniculate ganglion; l, lens; lp, lens placode; nc, nasal capsule; ns, nasal septum; oc, optic cup; or, optic recess; os, optic stalk; ot, otic vesicle; ov, otic vesicle; p, pinna; sag, statoacoustic ganglion; tv, telencephalic vesicle. Scale bars: 100  $\mu$ m.

Moreover, analysis of microarray data obtained from E11.5 *Hoxa2* mutant and control BA2 tissue (Donaldson et al., 2012) showed a 1.6-fold downregulation of *Hmx1* expression ( $P < 0.005$ ), similar to that of *Meis2*, a known target of *Hoxa2* (Amin et al., 2015). This suppression of *Hmx1* expression in E11.5 *Hoxa2* mutant embryos was validated by qRT-PCR (Fig. 7D). *In situ* hybridization for *Hmx1* on E10.5 embryos also supported reduced caudal BA2 expression in *Hoxa2* mutants compared with controls (Fig. 7E).

To assess whether the Hox-Pbx-Meis complex could transactivate the dmEKR in a heterologous cell type, we transiently transfected COS-1 cells with a construct, pGL4.23-dmEKR, containing a luciferase reporter cassette in which the dmEKR was inserted upstream of the minimal promoter. The dmEKR reporter was co-transfected with expression vectors encoding mHoxa2, mMeis1 and hPBX1A individually and in combination. Co-transfection of these transcription factors individually and in pairwise combinations did not result in a significant change in the levels of luciferase activity compared with transfection with the pGL4.23-dmEKR plasmid alone (Fig. 8A). However, the addition of all three expression vectors resulted in a ~17-fold increase in the levels of luciferase activity over basal levels (Fig. 8A). Deletion of the 32 bp sequence encompassing the binding site consensus sequences for Hox, Pbx and Meis (Fig. 7C) from the 594 bp construct (pGL4.23-dmEKRdel32) resulted in a severe reduction in enhancer activity (Fig. 8B). Most importantly, repeated transient transgenesis using the 594 bp dmEKR construct conducted in parallel with the newly generated dmEKRdel32 construct (Fig. 8C,D) demonstrated that the 32 bp sequence containing the Hox, Pbx and Meis binding sites is required for the enhancer to express in the dorsal aspect of BA1 and throughout BA2 (5/7 embryos versus 0/8 embryos; compare Fig. 8E-K with 8L-S). In addition, we noted that deletion of the 32 bp sequence also resulted in an expansion in two of eight embryos of the strong frontonasal expression domain rostrally into the medial and lateral nasal processes (Fig. S4H,I). A further four embryos showed weak rostral expansion with a diminution or loss of the frontonasal domain (Fig. S4J,K,M,N). Taken together, these data provide both *in vivo* and *in vitro* support for direct regulation of the *Hmx1* gene in BA2 by the Hox-Pbx-Meis complex via the dmEKR.

examined *Hoxa2* and *Meis* binding surrounding the *Hmx1* gene, in chromatin isolated from E11.5 BA1 and BA2 tissue, as described previously (Amin et al., 2015). *Hoxa2* and *Meis* binding profiles in BA2 showed overlapping prominent peaks ~80 kb downstream of the *Hmx1* gene (Fig. 7A), corresponding to the location of the dmEKR. Enhanced *Meis* binding was observed in BA2 tissue relative to the Hox-negative BA1, a feature associated with *Hoxa2* functional targets (Fig. 7A) (Amin et al., 2015). Chromatin immunoprecipitation (ChIP)-qPCR on BA2 chromatin revealed nearly tenfold greater enrichment of the *Hmx1* dmEKR enhancer region (Fig. 7B) than the established positive control (Amin et al., 2015), confirming *Hoxa2* binding to the core dmEKR sequence.



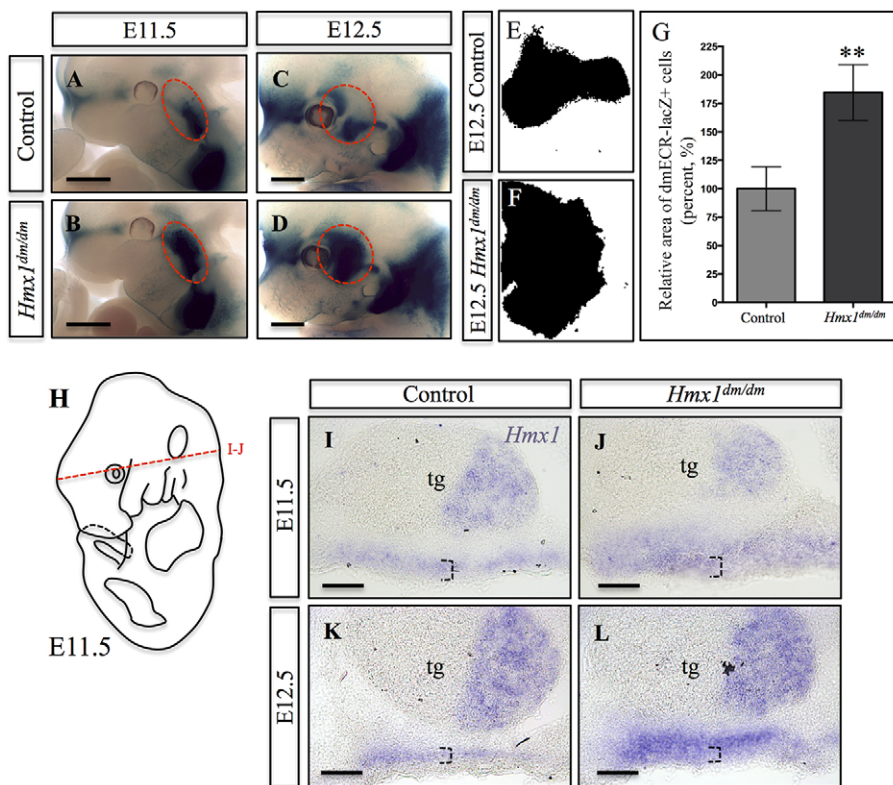

**Fig. 6. dmECR enhancer activity and *Hmx1* expression are expanded in *Hmx1<sup>dm/dm</sup>* mutants.** (A-D) dmECR staining in control (A,C) and *Hmx1<sup>dm/dm</sup>* mutant (B,D) embryos at E11.5 (A, B; control  $n=5$ , *Hmx1<sup>dm/dm</sup>* mutant  $n=7$ ) and E12.5 (C,D; control  $n=4$ , *Hmx1<sup>dm/dm</sup>* mutant  $n=4$ ) shows an expansion of the dmECR staining pattern in *Hmx1<sup>dm/dm</sup>* mutants (red dashed circle). (E,F) Representative binary particle area diagrams from ImageJ displaying dmECR-lacZ+ cells present in the E12.5 face of controls (E) and *Hmx1<sup>dm/dm</sup>* mutant (F) embryos. (G) Quantification of the area displayed in E and F for E12.5 controls ( $n=4$ ) and *Hmx1<sup>dm/dm</sup>* mutant ( $n=4$ ) embryos (plotted values are the mean $\pm$ s.e.m., \*\* $P=0.0016$ ). (H) Diagram of an E11.5 mouse embryo highlighting the transverse plane displayed in I and J. (I-L) *Hmx1* in situ on control (I,K) and *Hmx1<sup>dm/dm</sup>* mutant (J,L) E11.5 (I,J;  $n=2$ ) and E12.5 (K,L;  $n=2$ ) transverse sections show an expansion of *Hmx1* transcripts in *Hmx1<sup>dm/dm</sup>* mutants (compare I with J, and K with L, black dashed brackets). tg, trigeminal ganglion. Scale bars: 1 mm (A-D); 100  $\mu$ m (I-L).

## DISCUSSION

The distinctive lateral external ear placement that characterizes the *dumbo* phenotype is one of the most recognizable mutant presentations both in mice and in rats, and has made the *dumbo* rat a favorite amongst pet owners. However, *Hmx1*-related phenotypes have also been described in humans (OAS) and cattle (*crop ear*). In contrast to the loss-of-function mutations found in mice and humans, the mutations at the *Hmx1* locus in rats and cattle implicate a putative regulatory region located  $\sim 80$  kb 3' of the last exon (Quina et al., 2012a; Koch et al., 2013). At this site, we previously identified a highly conserved  $\sim 600$  bp segment (dmECR) that we hypothesized could represent a *cis*-regulatory enhancer of *Hmx1* expression (Turner and Cox, 2014). In this article, we demonstrate that the homologous mouse ECR sequence functions as a bona fide distal enhancer containing information required to direct expression to defined structures of the developing lateral face, including the dorsal aspect of BA1, BA2, tissue caudal to the eye, and to a specific region of frontonasal mesenchyme. In the anterior branchial arches, the dmECR provides a regulatory link between patterning of the embryonic axis by classic homeotic factors and morphogenesis of the external ear.

### Lateral cranioskeletal anomalies in *dumbo* mice are suggestive of a combination of primary and secondary defects

During our assessment of *Hmx1<sup>dm/dm</sup>* embryos, we identified previously unappreciated features of the *dumbo* phenotype. We noted an expansion of the central BA2-derived auricular hillock at E11.5 that leads to a bifurcated appearance of the caudal aspect of the developing pinnae at older embryonic ages. In the adult mutant, this highly penetrant trait is apparent as an ectopic cartilaginous flap on the back of the pinna. This may represent a simple duplication of a portion of the pinna structure or even a regionally restricted homeotic transformation. The additional postnatal cranioskeletal anomalies

that we have described may reflect a combination of primary and secondary effects. It is unlikely that BA-derived muscles have a cell-autonomous requirement for *Hmx1*, as we have shown that dmECR activity and *Hmx1* protein expression do not overlap the staining of *Isl1*, a marker for mesodermally derived muscle precursors in BA1 and BA2 (Nathan et al., 2008; Gopalakrishnan et al., 2015), which give rise to many muscles of the head and neck (Rinon et al., 2007). However, in *dumbo* animals, muscle attachment sites, such as the paired bony paraoccipital processes, are significantly hypoplastic. The paraoccipital processes, which are functionally analogous to the mastoid process in humans, are points of attachment of some of the major muscles of mastication and lateral head movement. Given that it is well established that mechanical strain forces from mastication can affect development of the bony mandibular angular process and patency of the cranial sutures (de Jong et al., 2011; Guerreiro et al., 2013; Rafferty et al., 2007), the altered shape of the mandibular angle and premature closure of the temporal sutures in *dumbo* mice are likely to be secondary to decreased biomechanical function. Additionally, we confirm here that *dumbo* mice exhibit nerve branching and organization defects of some lateral sensory facial nerves that innervate the pinnae and surrounding tissue, extending our prior findings (Quina et al., 2012b). Thus, the functional deficit in ear movement that we observed in *dumbo* mice could be the result of musculoskeletal defects, sensory defects, or a combination of both. Future fate-mapping experiments and more precise tissue-specific disruption of *Hmx1* should help resolve the cellular contributions to the *dumbo* phenotype.

### The 594 bp distal ECR functions as a facial mesenchyme-specific enhancer that is regulated in BA2 by the Hox-Pbx-Meis complex

The reproducible and restricted pattern of activity of the dmECR is strikingly similar to the activity of enhancers recently

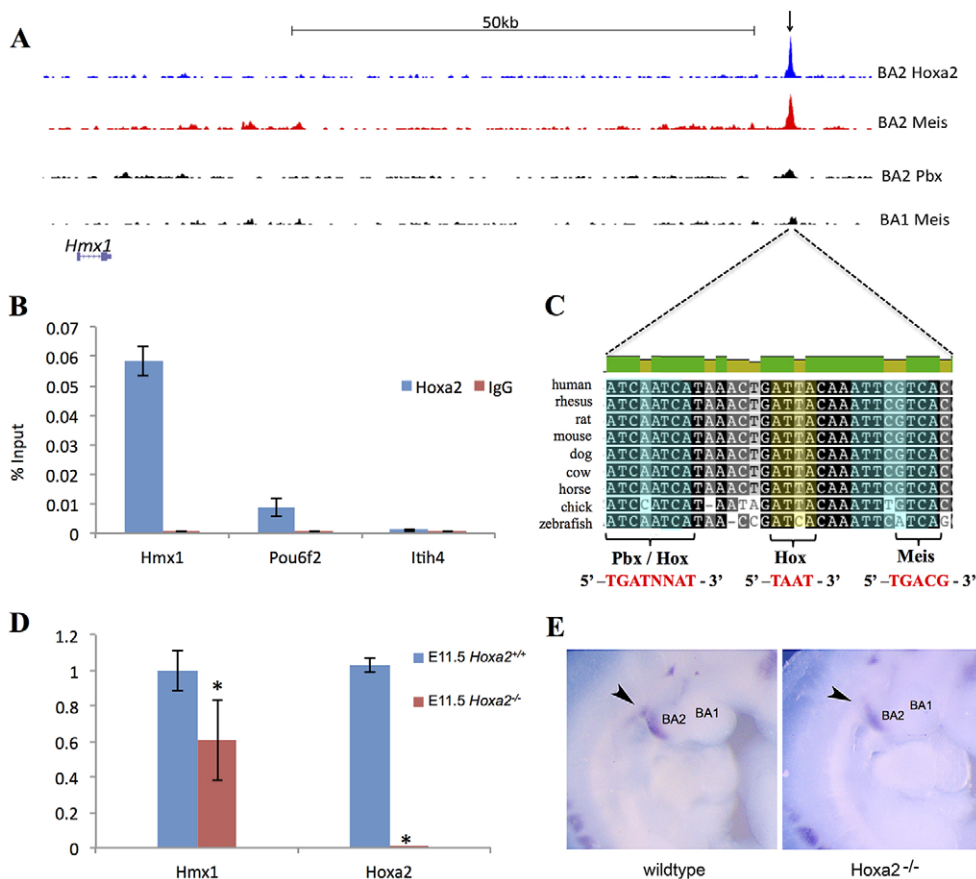

**Fig. 7. Hoxa2 binds to the dmECR *in vivo* and controls *Hmx1* expression.** (A) ChIP-seq binding profile of Hoxa2, Meis2 and Pbx at *Hmx1* gene in chromatin isolated from E11.5 first (BA1) and second (BA2) branchial arches. Black arrow highlights the binding region tested by qPCR in B. (B) Analysis of Hoxa2 binding to *Hmx1* enhancer by ChIP-qPCR. Enrichment is calculated as percent input. IgG is a negative control antibody. *Pou6f2* is a positive control and *Itih4* is a negative control. (C) Consensus binding sites within the dmECR are indicated on the 32 bp multispecies alignment, which includes multiple mammalian species as well as chick and zebrafish, and highlights potential Hox-Pbx (left, blue), Hox (yellow) and Meis (right, blue) binding sites (Amin et al., 2015). (D) qRT-PCR validates diminished *Hmx1* expression in E11.5 *Hoxa2* mutant embryos (five technical replicates; *Hmx1*  $P=0.0155$ , *Hoxa2*  $P=0.0001$ ). (E) Whole-mount *in situ* hybridization for *Hmx1* expression in E11.5 embryos shows reduced caudal BA2 expression in *Hoxa2* mutants (right panel, arrowhead) compared with controls (left panel, arrowhead). Data are mean $\pm$ s.d.

identified through a genome-wide analysis of Hox and Pbx transcriptional targets (Amin et al., 2015). Indeed, *Hoxa2*, *Pbx1* and their binding partners, the Meis proteins, all share overlapping expression domains with *Hmx1* in the craniofacial mesenchyme of BA1 and BA2 during development (Amin et al., 2015), and knockout of each results in a more severe ear malformation than that seen in the *dumbo* mice (Minoux et al., 2013; N.B. and T.C.C., unpublished). Consistent with this, we identified putative *cis*-binding sites for homeobox proteins and the Hox-Pbx complex within the dmECR (see Fig. 7C). These sites are found in the most conserved portion of the dmECR, shared not only among mammalian species but also in chick, frogs and zebrafish, albeit with one or two nucleotide differences in these latter species. The likely importance of these binding sites in mammals is emphasized by the *crop ear* cattle allele, which is a 76 bp duplication (Koch et al., 2013) involving this central core containing the Hox-Pbx-Meis binding motifs.

Consistent with the presence of predicted binding sites, genome-wide occupancy of *Hoxa2* and Meis *in vivo* shows that both *Hoxa2* and Meis bind to the dmECR *in vivo*. Moreover, our co-transfection analysis has shown that the dmECR enhancer is strongly activated in the presence of *Hoxa2*, Meis1 and PBX1A. Deletion of a 32 bp region containing the core Hox-Pbx-Meis binding sites within the 594 bp dmECR led to a significant reduction in enhancer activation. This was also confirmed using transient transgenesis where deletion of the 32 bp region containing the core Hox-Pbx-Meis binding sites resulted in the loss of enhancer expression in the dorsal aspect of BA1 and throughout BA2. These findings validate the earlier presumption

that disruption of the ECR in both the *dumbo* rat and the *crop ear* cattle is the cause of the phenotypic abnormalities in these species. Together, these results place *Hmx1* immediately downstream of the early branchial arch patterning genes, as one of the few validated targets of *Hoxa2*.

### Hmx1 and the dmECR: conduits to elucidating lateral facial gene networks

The combined findings of additional lateral facial anomalies in *dumbo* mutants (mice and rats) and a critical distal enhancer of *Hmx1* that is regulated by the Hox-Pbx-Meis complex, position *Hmx1* as an early target of branchial arch patterning factors. In this regard, the dmECR is therefore likely to provide a unique conduit through which we will be able to elucidate additional upstream transcriptional regulators that help pattern the early arch and frontonasal mesenchyme. Candidates include members of the Six and Eya families (Cox et al., 2014), and both *Tbx15* and *Sall1*, given the phenotypic presentation of auricular malformations in mice and humans when these genes are mutated (Cox et al., 2014). Furthermore, identification of downstream targets of *Hmx1* itself, via gene expression studies in the *dumbo* mouse, should aid in the identification of specifiers of lateral facial tissues including the pinnae and their supporting structures as well as the facial sensory nerves innervating this region. Both approaches should ultimately identify new candidate genes for disorders involving lateral facial structures: upstream regulators may represent candidates for more severe malformations, while cases of ear malformation that occur without extensive changes in other branchial arch structures may lie immediately downstream of *HMX1* (Cox et al., 2014). In fact,



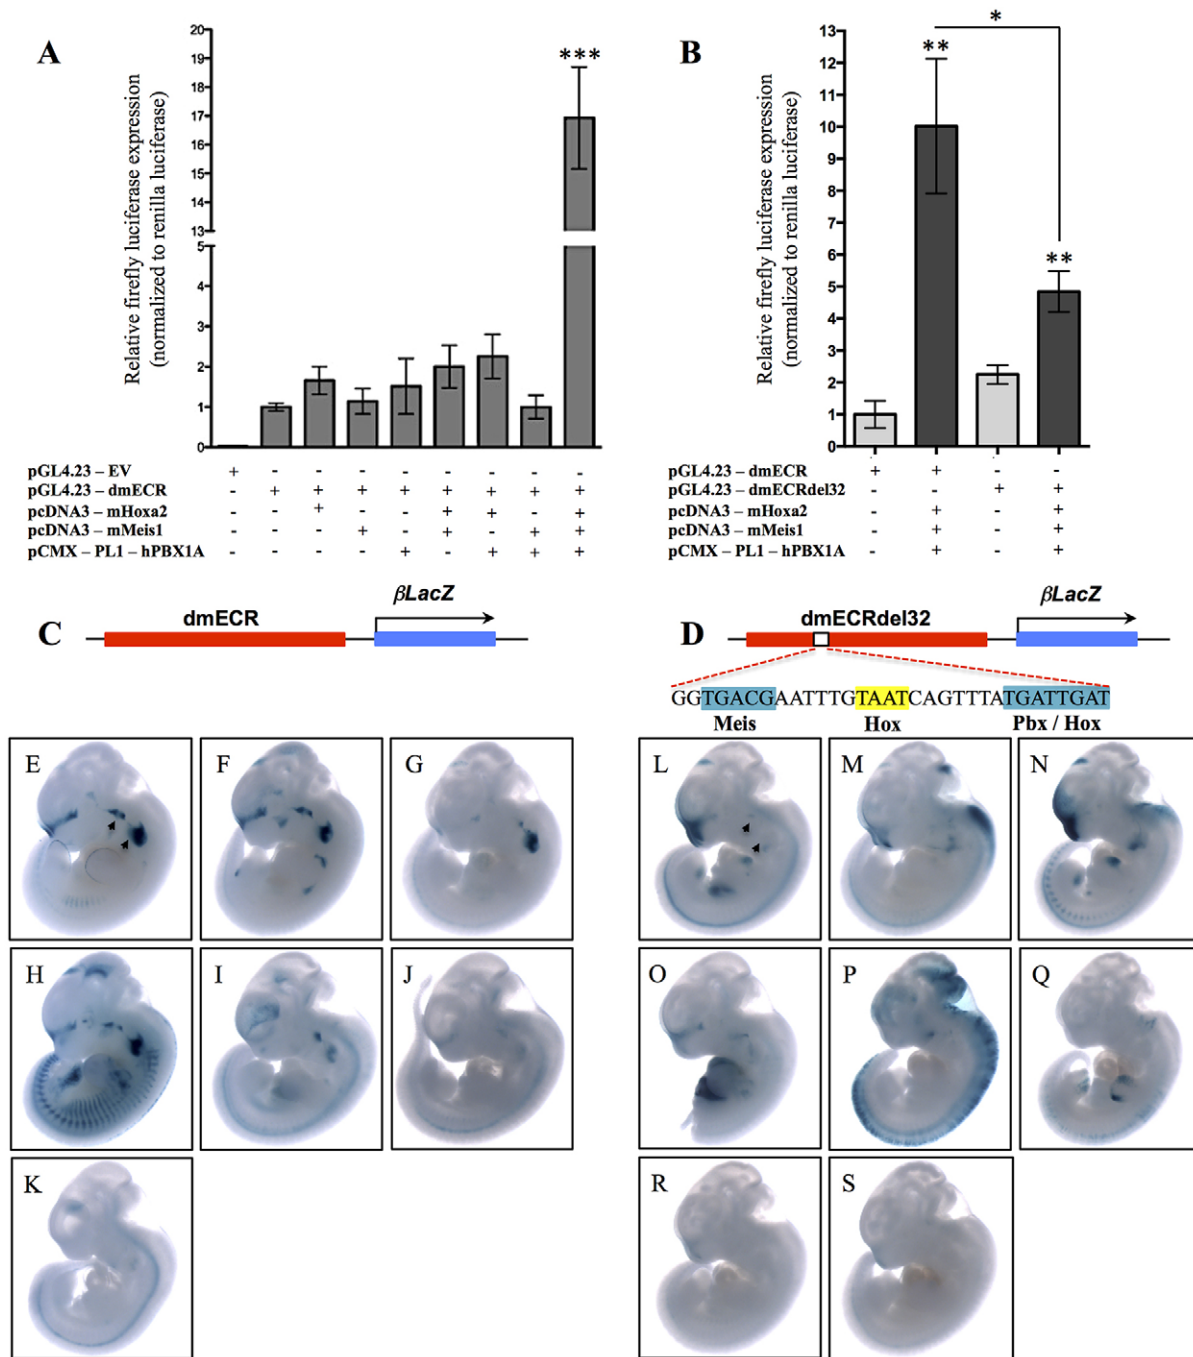

**Fig. 8. Hox-Pbx-Meis cooperatively bind to and regulate the dmECR via a 32 bp sequence.** (A) Luciferase activity (relative firefly/*Renilla* levels) for the 594 bp dmECR sequence following transfection with the pcDNA3-mHoxa2, pcDNA3-mMeis1 or pCMX-PL1-hPBX1A expression vectors showed strong activation only in the presence of Hoxa2, Meis1 and PBX1A proteins (replicates  $n=3$ , Hoxa2  $P=0.1386$ , Meis1  $P=0.6913$ , PBX1A  $P=0.4998$ , Hoxa2+Meis1  $P=0.1327$ , Hoxa2+PBX1A  $P=0.0862$ , Meis1+PBX1A  $P=0.9959$ , Hoxa2+Meis1+PBX1A  $***P=0.0009$ ). (B) Luciferase activity for the intact 594 bp dmECR sequence compared with the dmECRdel32 construct harboring the 32 bp deletion of the adjacent Hox-Pbx-Meis binding sites (see D). A significant reduction in enhancer activation from the dmECRdel32 construct compared with the intact dmECR construct was seen in the presence of Hoxa2, Meis1 and PBX1A proteins (replicates  $n=3$ , pGL4.23-dmECR+Hoxa2+Meis1+PBX1A  $P=0.0019$ , pGL4.23-dmECRdel32+Hoxa2+Meis1+PBX1A  $P=0.0031$ ; pGL4.23-dmECR compared with pGL4.23-dmECRdel32  $P=0.0152$ ). (C-S) Transient transgenesis for the intact 594 bp dmECR construct (C) compared with the dmECRdel32 construct (D) showed almost complete loss of BA/1/2 staining in E11.5 transient transgenic embryos generated from the dmECRdel32 construct (L-S, arrowheads) compared with the consistency of activity in these regions in transient transgenic embryos generated from the intact dmECR construct (E-K, arrowheads).

late-acting genes such as *HMX1* are likely to be more relevant to pediatric practice as mild auricular and lateral facial anomalies, including facial palsies, collectively represent the third most commonly presenting group of conditions in craniofacial centers in the USA (Luquetti et al., 2012) and yet there is still little

known about their underlying genetic basis. Given that mutations in the dmECR underlie isolated phenotypic presentations in multiple non-human mammalian species, this warrants inclusion of enhancers such as this in future mutational analysis of relevant patient cohorts.

## MATERIALS AND METHODS

### Animals and genotyping

Mice harboring the *dumbo* allele (*Hmx1*<sup>+/dm</sup>) were generated from the original B6:C3Fe-Hmx1<sup>dmbo/Rw/JcsJk/jn</sup> mice, maintained on a C57Bl/6N background, and genotyped as described previously (Quina et al., 2012a,b). *Hoxa2* mutant mice were described previously (Gendron-Maguire et al., 1993). We designated E0.5 to be noon on the day a plug was detected. Maintenance and genotyping of *dumbo* rats was also performed as previously described (Quina et al., 2012a). All animal use was approved by the appropriate Institutional Animal Care and Use Committee. All data were collected from at least three animals of a particular genotype at each gestational and postnatal time point described, unless otherwise stated. Body weights were measured postmortem.

### Generation of transgenic mice

The 6094 bp fragment homologous to the sequence deleted in *dumbo* rats was PCR amplified from mouse genomic DNA using the *NorI*- and *AscI*-linked oligonucleotides: *dmbo*delf, GGGATCGCGGCCGCGTGCAC-CATCTTTGAGGACTTAG; *dmbo*dellR, GATCGGCGCGCCGTAGGG-AAGCTGAGGCCAAG. The 594 bp ECR (hereafter called dmECR) was amplified using the *NorI*- and *AscI*-linked oligonucleotides: dmECR-F, GGGATCGCGGCCGCGAATCTGGCCAGTCAGTGTA; dmECR-R, GATCGGCGCGCCGCTTGGGGGTGGCAAATG. The underlined bases indicate the incorporated restriction endonuclease binding sites. The 6094 bp and 594 bp fragments were separately inserted into the Hsp68-*lacZ*-Gateway vector, and the resulting vectors linearized for injection using *NorI*. Transgenic mice were produced by pronuclear injection into C57Bl/6J or CD-1 single-cell embryos using standard techniques (Nagy et al., 2003). The 594 bp transgenic construct was also subsequently used to generate four stable lines (CH-5791, CH-5820, CH-5821 and CH-5831). Transgenic mice and embryos were genotyped by real-time PCR using transgene-specific oligonucleotides: LacZp1F, GCTGGATCAAATCTGTGCGATCC-TT and LacZp1R, CGCGTACATCGGGCAAATAATATC (95 bp product); LacZp2F, ATAGCGATAACGAGCTCCTGCAT and LacZp2R, ACTG-TTTACCTTGTGGAGCGACATC (99 bp product).

### X-gal and whole-mount neurofilament staining

Embryos with *lacZ* transgenes were stained with X-gal according to standard techniques (Nagy et al., 2003). Antibodies recognizing neurofilaments (2H3) were used to visualize nerves in E11.5-E13.5 embryos, as previously described (Vickerman et al., 2011). The 2H3 antibody was developed by T. Jessel and J. Dodd (Dodd et al., 1988) and was obtained from the Developmental Studies Hybridoma Bank developed under the auspices of NICHD and maintained by the University of Iowa, Department of Biology, Iowa City, IA 52242, USA.

### Immunohistochemistry

Embryos to be used for immunohistochemistry were prepared as previously described (Rosin et al., 2015). Cryosections (16–20 μm) were exposed to either anti-Hmx1 (1:2000; Quina et al., 2012b), anti-Isl1 (1:500; AB20670, Abcam), anti-cleaved caspase 3 (1:1200; 9664S, Cell Signaling) or anti-Ki67 (1:200; RM-9106 S0, Thermo Scientific) at 4°C overnight, then washed with PBS and exposed to secondary antibody (1:300; biotinylated donkey anti-rabbit; 711-065-152, Jackson ImmunoResearch) for 2 h at room temperature. This was followed by a 30 min incubation with Vectastain Elite ABC reagent (Vector Labs), and DAB Peroxidase (HRP) substrate color development for 5 min (Vector Labs). Images were captured on a Leica 4000B microscope. Brightness and/or contrast of the entire image were adjusted using Adobe Photoshop CS5.1 if deemed appropriate.

### In situ hybridization and qPCR

Cryosections (16–20 μm) were exposed to a digoxigenin (DIG)-labeled *Hmx1* riboprobe (1:300; Wang et al., 1998) at 68°C overnight. DIG-labeled riboprobes were detected with an alkaline phosphatase-conjugated anti-DIG antibody (11093274910, Roche) and BM Purple AP (Roche) was used as the color development substrate. BA2 of E11.5 embryos from *Hoxa2*<sup>+/-</sup> intercrosses were dissected out and snap-frozen in dry ice. After genotyping

the embryos, pools were made with the wild-type and *Hoxa2*<sup>-/-</sup> BA2, and total RNA was extracted using Trizol. The sequences of the primers used in qPCR are: Hmx1 Fwd, 5'-CGGCTGCGGAGGTACAA-3'; Hmx1 Rev, 5'-AGTCCCGGTGCTTGTG-3'; Hoxa2 Fwd, 5'-GCCTCGGCCACAA-AGAA-3'; Hoxa2 Rev, 5'-CGGCGATTCCACCTGCG-3'.

### OPT and microCT imaging

All tomographic imaging was conducted in the Small Animal Tomographic Analysis (SANTA) Facility at Seattle Children's Research Institute. Samples for OPT were prepared and imaged as described by Zovein et al. (2010). MicroCT imaging was performed at an isotropic resolution of 17.21 μm using a Skyscan 1076 scanner with the following settings: 55 kV, 180 μA, 1.0 mm Al filter, 360 ms exposure, 0.7° rotation step, and three-frame averaging. Raw OPT and microCT scan data were reconstructed using NRecon V1.6 software (Skyscan, Belgium) and rendered in 3D using the Drishti software V2.6 (Limaye, 2012). Reconstructed data were imported into Analyze 10.0 (Mayo Clinic) for mandible and skull segmentation and comprehensive shape analysis performed as previously described (Rolfe et al., 2013).

### Luciferase assays

The dmECR and dmECRdel32 fragments were PCR amplified from genomic DNA using the *KpnI* and *HindIII*-linked oligonucleotides: ECR-F, GTGAGGTACCGAAGCCAGTCAGTGTA; ECR-R, CAGAAGCTTCT-TGGGGGTGGCAA (32 bp deletion primers: ECRdel32-F, CTGGAA-ACTCGGCTTCTGTTCACAAG and ECRdel32-R, CAGAAATTGATT-CTCCAGAAAGGCAG) and separately ligated into the pGL4.23 firefly luciferase reporter plasmid (Promega) using standard techniques. The vectors were co-transfected into COS-1 cells (ATCC CRL-1650, passage 39) with either an empty pcDNA3.2 vector or in different combinations with the expression vectors pcDNA3-mHoxa2, pcDNA3-mMeis1 and/or pCMX-PL1-hPBX1A using Polyjet (SigmaGen) according to the manufacturer's recommendations. Passive lysis buffer (PLB, Promega; 100 μl) was added to each well during collection. Firefly (LARI, Promega) and *Renilla* (Stop & Glo reagent, Promega) luciferase activities were assayed using a Monolight 2010 luminometer (Analytical Luminescence Laboratory, CA, USA). All assays were performed in triplicate.

### Chromatin immunoprecipitation

ChIP for Hoxa2, Meis2 and Pbx were performed as described previously (Amin and Bobola, 2014). ChIP-qPCR analysis of Hoxa2 binding to the dmECR was accomplished using the oligonucleotides: Fwd, TCGAGCTCATAGCGCTTTT; Rev, GGGGAGATAAAGTGAAACA-CAT. Enrichment was calculated as percent input, with IgG used as a negative control. *Pou6f2* was used as a positive control and *Itih4* as a negative control (Donaldson et al., 2012). The Hoxa2 antibody used for ChIP was described previously (Kutejova et al., 2008).

### Behavioral analysis

Adult (P60+) mice were recorded before, during and after they were exposed to a 10 s constant-pressure puff of air to determine if they could respond by (1) closing their eyes, and (2) tucking their ears back against their head. This was repeated three times for each animal.

### Quantification methods and statistical analysis

Quantitative results for body weight, stained area, cell counts and luciferase activity are represented by mean scores ± s.e.m. and were analyzed by two-tailed unpaired *t*-tests using Prism 3 (GraphPad Software). Genotype ratios were analyzed using a  $\chi^2$  test.

### Acknowledgements

The authors thank L. Quina, M. Deng and N. Kim for supplying antibodies; L. Quina and M. Deng for additional experimental assistance; I. Skuplik and J. Cobb for supplying luciferase vectors; V. Afzal for help with transgenic mouse experiments; and S. Vora and E. Camci for critical discussion. We are thankful to the National BioResource Project - Rat for providing *dumbo* rats (KFRS4/Kyo).

### Competing interests

The authors declare no competing or financial interests.



### Author contributions

The study was conceived and supervised by T.C.C. and E.E.T.; J.M.R. performed all experiments not otherwise mentioned; W.L. characterized the *dumbo* phenotype, and performed the initial transgenic work and behavioral analysis with academic and technical assistance from L.L.C.; S.M.R. did the shape analysis studies; V.L. and N.B. performed and contributed all ChIP data and analyses in the *Hoxa2* embryos; J.A.A. and A.V. generated the transient transgenics; T.K. assisted with the rat studies. J.M.R., T.C.C. and E.E.T. wrote the manuscript with edits from all authors.

### Funding

This work was supported in part by the Laurel Foundation Endowment for Craniofacial Research (T.C.C.); the National Institutes of Health (NIH) [R01-NS064993 to E.E.T.; R01-HG003988, U54-HG006997 and U01-DE024427 to A.V.]; a Seattle Children's Research Institute InterCenter Grant (T.C.C. and E.E.T.); and the Medical Research Council UK [MR/L009986/1 to N.B.]. Research conducted at the E.O. Lawrence Berkeley National Laboratory is performed under U.S. Department of Energy contract DE-AC02-05CH11231, University of California. J.M.R. and S.M.R. are supported by postdoctoral training fellowships from the Canadian Institutes of Health Research [MEF-140891] and the National Institute of Dental and Craniofacial Research [F32 DE025519], respectively. W.L. is supported by a University of Washington, School of Dentistry Institutional Trainee Award [R90 DE023059]. Deposited in PMC for release after 12 months.

### Supplementary information

Supplementary information available online at <http://dev.biologists.org/lookup/doi/10.1242/dev.133736.supplemental>

### References

- Alasti, F., Sadeghi, A., Sanati, M. H., Farhadi, M., Stollar, E., Somers, T. and Van Camp, G. (2008). A mutation in HOXA2 is responsible for autosomal-recessive microtia in an Iranian family. *Am. J. Hum. Genet.* **82**, 982-991.
- Amin, S. and Bobola, N. (2014). Chromatin immunoprecipitation and chromatin immunoprecipitation with massively parallel sequencing on mouse embryonic tissue. *Methods Mol. Biol.* **1196**, 231-239.
- Amin, S., Donaldson, I. J., Zannino, D. A., Hensman, J., Rattray, M., Losa, M., Spitz, F., Ladam, F., Sagerström, C. and Bobola, N. (2015). *Hoxa2* selectively enhances Meis binding to change a branchial arch ground state. *Dev. Cell* **32**, 265-277.
- Arenkiel, B. R., Tvrdik, P., Gaufo, G. O. and Capecchi, M. R. (2004). Hoxb1 functions in both motoneurons and in tissues of the periphery to establish and maintain the proper neuronal circuitry. *Genes Dev.* **18**, 1539-1552.
- Cox, T. C., Camci, E. D., Vora, S., Luquetti, D. V. and Turner, E. E. (2014). The genetics of auricular development and malformation: new findings in model systems driving future directions for microtia research. *Eur. J. Med. Genet.* **57**, 394-401.
- de Jong, W. C., Korfage, J. A. M. and Langenbach, G. E. J. (2011). The role of masticatory muscles in the continuous loading of the mandible. *J. Anat.* **218**, 625-636.
- Dodd, J., Morton, S. B., Karagogeos, D., Yamamoto, M. and Jessell, T. M. (1988). Spatial regulation of axonal glycoprotein expression on subsets of embryonic spinal neurons. *Neuron* **1**, 105-116.
- Donaldson, I. J., Amin, S., Hensman, J. J., Kutejova, E., Rattray, M., Lawrence, N., Hayes, A., Ward, C. M. and Bobola, N. (2012). Genome-wide occupancy links *Hoxa2* to Wnt-beta-catenin signaling in mouse embryonic development. *Nucleic Acids Res.* **40**, 3990-4001.
- Gendron-Maguire, M., Mallo, M., Zhang, M. and Gridley, T. (1993). *Hoxa-2* mutant mice exhibit homeotic transformation of skeletal elements derived from cranial neural crest. *Cell* **75**, 1317-1331.
- Gillespie, R. L., Urquhart, J., Lovell, S. C., Biswas, S., Parry, N. R. A., Schorderet, D. F., Lloyd, I. C., Clayton-Smith, J. and Black, G. C. (2015). Abrogation of HMX1 function causes rare oculoauricular syndrome associated with congenital cataract, anterior segment dysgenesis, and retinal dystrophy. *Invest. Ophthalmol. Vis. Sci.* **56**, 883-891.
- Gopalakrishnan, S., Comai, G., Sambasivan, R., Francou, A., Kelly, R. G. and Tajbakhsh, S. (2015). A cranial mesoderm origin for esophagus striated muscle. *Dev. Cell* **34**, 694-704.
- Guerreiro, F. d. S., Diniz, P., Carvalho, P., Ferreira, E., Avancini, S. R. P. and Ferreira-Santos, R. I. (2013). Effects of masticatory hypofunction on mandibular morphology, mineral density and basal bone area. *Braz. J. Oral Sci.* **12**, 205-212.
- Koch, C. T., Bruggmann, R., Tetens, J. and Drögemüller, C. (2013). A non-coding genomic duplication at the HMX1 locus is associated with crop ears in highland cattle. *PLoS ONE* **8**, e77841.
- Kuramoto, T., Yokoe, M., Yagasaki, K., Kawaguchi, T., Kumafuji, K. and Serikawa, T. (2010). Genetic analyses of fancy rat-derived mutations. *Exp. Anim.* **59**, 147-155.
- Kutejova, E., Engist, B., Self, M., Oliver, G., Kirilenko, P. and Bobola, N. (2008). Six2 functions redundantly immediately downstream of *Hoxa2*. *Development* **135**, 1463-1470.
- Limaye, A. (2012). Drishti: a volume exploration and presentation tool. *Proc. SPIE 8506, Developments in X-Ray Tomography VIII*, 85060X.
- Luquetti, D. V., Heike, C. L., Hing, A. V., Cunningham, M. L. and Cox, T. C. (2012). Microtia: epidemiology and genetics. *Am. J. Med. Genet. A* **158A**, 124-139.
- Minoux, M., Kratochwil, C. F., Ducret, S., Amin, S., Kitazawa, T., Kurihara, H., Bobola, N., Vilain, N. and Rijli, F. M. (2013). Mouse *Hoxa2* mutations provide a model for microtia and auricle duplication. *Development* **140**, 4386-4397.
- Munroe, R. J., Prabhu, V., Acland, G. M., Johnson, K. R., Harris, B. S., O'Brien, T. P., Welsh, I. C., Noden, D. M. and Schimenti, J. C. (2009). Mouse H6 Homeobox 1 (*Hmx1*) mutations cause cranial abnormalities and reduced body mass. *BMC Dev. Biol.* **9**, 27.
- Nagy, A., Gertsenstein, M., Vintersten, K. and Behringer, R. R. (2003). *Manipulating the Mouse Embryo: A Laboratory Manual*. Cold Spring Harbor, New York, USA: Cold Spring Harbor Press.
- Nathan, E., Monovich, A., Tirosh-Finkel, L., Harrelson, Z., Rousso, T., Rinon, A., Harel, I., Evans, S. M. and Tzahor, E. (2008). The contribution of *Islet1*-expressing splanchnic mesoderm cells to distinct branchiomeric muscles reveals significant heterogeneity in head muscle development. *Development* **135**, 647-657.
- Quina, L. A., Kuramoto, T., Luquetti, D. V., Cox, T. C., Serikawa, T. and Turner, E. E. (2012a). Deletion of a conserved regulatory element required for *Hmx1* expression in craniofacial mesenchyme in the *dumbo* rat: a newly identified cause of congenital ear malformation. *Dis. Model. Mech.* **5**, 812-822.
- Quina, L. A., Tempest, L., Hsu, Y.-W. A., Cox, T. C. and Turner, E. E. (2012b). *Hmx1* is required for the normal development of somatosensory neurons in the geniculate ganglion. *Dev. Biol.* **365**, 152-163.
- Rafferty, K. L., Sun, Z., Egbert, M., Bakko, D. W. and Herring, S. W. (2007). Changes in growth and morphology of the condyle following mandibular distraction in minipigs: overloading or underloading? *Arch. Oral Biol.* **52**, 967-976.
- Rijli, F. M., Mark, M., Lakkaraju, S., Dierich, A., Dollé, P. and Chambon, P. (1993). A homeotic transformation is generated in the rostral branchial region of the head by disruption of *Hoxa-2*, which acts as a selector gene. *Cell* **7**, 1333-1349.
- Rinon, A., Lazar, S., Marshall, H., Buchmann-Moller, S., Neufeld, A., Elhanany-Tamir, H., Taketo, M. M., Sommer, L., Krumlauf, R. and Tzahor, E. (2007). Cranial neural crest cells regulate head muscle patterning and differentiation during vertebrate embryogenesis. *Development* **134**, 3065-3075.
- Rolle, S. M., Camci, E. C., Mercan, E., Shapiro, L. G. and Cox, T. C. (2013). A new tool for quantifying and characterizing asymmetry in bilaterally paired structures. *Conf. Proc. IEEE Eng. Med. Biol. Soc.* **2013**, 2364-2367.
- Rosin, J. M., Kurrasch, D. M. and Cobb, J. (2015). *Shox2* is required for the proper development of the facial motor nucleus and the establishment of the facial nerves. *BMC Neurosci.* **16**, 424.
- Schorderet, D. F., Nichini, O., Boisset, G., Polok, B., Tiab, L., Mayeur, H., Raji, B., de la Houssaye, G., Abitbol, M. M. and Munier, F. L. (2008). Mutation in the human homeobox gene *NKX5-3* causes an oculo-auricular syndrome. *Am. J. Hum. Genet.* **82**, 1178-1184.
- Selleri, L., Depew, M. J., Jacobs, Y., Chanda, S. K., Tsang, K. Y., Cheah, K. S., Rubenstein, J. L., O'Gorman, S. and Cleary, M. L. (2001). Requirement for *Pbx1* in skeletal patterning and programming chondrocyte proliferation and differentiation. *Development* **128**, 3543-3557.
- Turner, E. E. and Cox, T. C. (2014). Genetic evidence for conserved non-coding element function across species—the ears have it. *Front. Physiol.* **5**, 7.
- Tvrdik, P. and Capecchi, M. R. (2006). Reversal of *Hox1* gene subfunctionalization in the mouse. *Dev. Cell* **11**, 239-250.
- Vaclavik, V., Schorderet, D. F., Borruat, F.-X. and Munier, F. L. (2011). Retinal dystrophy in the oculo-auricular syndrome due to HMX1 mutation. *Ophthalm. Genet.* **32**, 114-117.
- Vickerman, L., Neufeld, S. and Cobb, J. (2011). *Shox2* function couples neural, muscular and skeletal development in the proximal forelimb. *Dev. Biol.* **350**, 323-336.
- Wang, W., Van De Water, T. and Lufkin, T. (1998). Inner ear and maternal reproductive defects in mice lacking the *Hmx3* homeobox gene. *Development* **125**, 621-634.
- Zovein, A. C., Turlo, K. A., Ponec, R. M., Lynch, M. R., Chen, K. C., Hoffmann, J. J., Cox, T. C., Gasson, J. C. and Iruela-Arispe, M. L. (2010). Vascular remodeling of the vitelline artery initiates extravascular emergence of hematopoietic clusters. *Blood* **116**, 3435-3444.
